# Supplementary material for: Prevalence of and Risk Factors for Drug-Related Readmissions in Older Adults: A Systematic Review and Meta-Analysis
Source: Springer Nature journal article supplement (doi:10.1007/s40266-023-01076-8), 2023-10-21
Supplement: MOESM1 [file 26209992]

## Prevalence of and Risk Factors for Drug-Related Readmissions in Older Adults: A Systematic Review and Meta-Analysis

Narisha Prasad<sup>1</sup>, Edward C.Y. Lau<sup>1</sup>, Ilsa Wojt<sup>1</sup>, Jonathan Penm<sup>1,2</sup>, Zhaoli Dai-Keller<sup>1,3</sup>,

Edwin C.K. Tan<sup>1,4</sup>

1. The University of Sydney, School of Pharmacy, Faculty of Medicine and Health, Sydney, New South Wales, Australia
2. Department of Pharmacy, Prince of Wales Hospital, Randwick, New South Wales, Australia
3. School of Population Health, Faculty of Medicine and Health, The University of New South Wales, Sydney, New South Wales, Australia
4. The University of Sydney, Charles Perkins Centre, Pharmaceutical Policy Node, Sydney, New South Wales, Australia

Corresponding author: Edwin Tan (edwin.tan@sydney.edu.au)

Supplementary Table 1

Search strategy for Medline

|                                       |                                                                                                                                                                                                                                                                                                    |
|---------------------------------------|----------------------------------------------------------------------------------------------------------------------------------------------------------------------------------------------------------------------------------------------------------------------------------------------------|
| Concept 1:<br>medication<br>related   | “Drug related side effects and adverse reactions”/ OR “adverse drug event*”.mp OR “adverse drug reaction*”.mp OR “side effect*”.mp OR Medication Errors/ OR “adverse drug outcome*”.mp OR “medication related”.mp OR “drug related”.mp OR “drug induced problem*”.mp OR “drug therapy problem*”.mp |
| Concept 2:<br>hospital<br>readmission | Readmission*.mp OR Patient readmission/ OR rehospitali?*.mp OR (hospital* adj2 readmission*).mp                                                                                                                                                                                                    |
| Concept 3:<br>older adults            | Aged/ Or elder*.mp OR older.mp OR Geriatrics/ OR senior.mp                                                                                                                                                                                                                                         |

Supplementary Table 2

Search strategy for Embase

|                                       |                                                                                                                                                                                                          |
|---------------------------------------|----------------------------------------------------------------------------------------------------------------------------------------------------------------------------------------------------------|
| Concept 1:<br>medication<br>related   | adverse drug reaction/ OR “adverse drug event*”.mp OR “side effect*”.mp OR medication error/ OR “adverse drug outcome*”.mp OR “medication related”.mp OR “drug related”.mp OR “drug therapy problem*”.mp |
| Concept 2:<br>hospital<br>readmission | Hospital readmission/ OR readmission*.mp OR rehospitali?*.mp OR (hospital* adj2 readmission*).mp                                                                                                         |

|                         |                                                                                                |
|-------------------------|------------------------------------------------------------------------------------------------|
| Concept 3: older adults | aged/ OR elder*.mp OR senior.mp OR aged hospital patient/.mp OR geriatric patient/ OR older.mp |
|-------------------------|------------------------------------------------------------------------------------------------|

Supplementary Table 3

Search strategy for CINAHL

|                                 |                                                                                                                                                                                    |
|---------------------------------|------------------------------------------------------------------------------------------------------------------------------------------------------------------------------------|
| Concept 1: medication related   | (MH Adverse Drug Event+) OR side effect* OR (MH Medication Error+) OR adverse drug reaction* OR medication related OR drug related OR drug induced problem OR drug therapy problem |
| Concept 2: hospital readmission | (MH Readmission*) OR rehospitali?* OR hospital readmission* OR patient readmission*                                                                                                |
| Concept 3: older adults         | (MH Aged+) OR elder* OR older OR geriatric OR senior                                                                                                                               |

Supplementary Table 4

Search strategy for Scopus

|                                 |                                                                                                                                      |
|---------------------------------|--------------------------------------------------------------------------------------------------------------------------------------|
| Concept 1: medication related   | “Hospital readmission*” OR readmission* OR rehospitali?* OR “patient readmission*” OR (hospital* adj2 readmission*)                  |
| Concept 2: hospital readmission | “Adverse drug reaction*” OR “adverse drug event*” OR “side effect*” OR “medication error*” OR “adverse drug outcome*” OR “medication |

|                            |                                                                                                                      |
|----------------------------|----------------------------------------------------------------------------------------------------------------------|
|                            | related” OR “drug related” OR “drug induced problem*” OR<br>“medication induced problem*” OR ‘drug therapy problem*” |
| Concept 3: older<br>adults | aged OR elder* OR senior OR geriatric* OR older                                                                      |

Supplementary Table 5: Quality assessment performed using the Joanna Briggs Institute (JBI) checklist for prevalence studies

| Author, year          | Was the sample frame appropriate to address the target population? | Were study participants sampled in an appropriate way? | Was the sample size adequate? | Were the study subjects and the setting described in detail? | Was the data analysis conducted with sufficient coverage of the identified sample? | Were valid methods used for the identification of the condition? | Was the condition measured in a standard, reliable way for all participants? | Was there appropriate statistical analysis? | Was the response rate adequate, and if not, was the low response rate managed appropriately? |
|-----------------------|--------------------------------------------------------------------|--------------------------------------------------------|-------------------------------|--------------------------------------------------------------|------------------------------------------------------------------------------------|------------------------------------------------------------------|------------------------------------------------------------------------------|---------------------------------------------|----------------------------------------------------------------------------------------------|
| Ekerstad et al, 2017  | Yes                                                                | Yes                                                    | Yes                           | Yes                                                          | Yes                                                                                | Yes                                                              | Yes                                                                          | Yes                                         | No                                                                                           |
| Hauviller et al, 2016 | Yes                                                                | Yes                                                    | Yes                           | Yes                                                          | Yes                                                                                | Yes                                                              | Yes                                                                          | Yes                                         | Yes                                                                                          |
| Kempen et al, 2022    | Yes                                                                | Yes                                                    | Yes                           | Yes                                                          | Yes                                                                                | Yes                                                              | Yes                                                                          | Yes                                         | Yes                                                                                          |
| Parekh et al, 2018    | Yes                                                                | Yes                                                    | Yes                           | Yes                                                          | Yes                                                                                | Yes                                                              | Yes                                                                          | Yes                                         | Yes                                                                                          |
